# Supplementary material for: Abscisic Acid Improves Linoleic Acid Accumulation Possibly by Promoting Expression of EgFAD2 and Other Fatty Acid Biosynthesis Genes in Oil Palm Mesocarp
Source: Front Plant Sci. 2021 Dec 3;12:748130. doi: 10.3389/fpls.2021.748130 (PMC8678531; doi:10.3389/fpls.2021.748130)
Supplement: Supplementary file 10 [file Table_5.csv]

Supplementary Table 5 GO annotation in CK_5-vs-A2_5
Level 2	Level 1	num
antioxidant activity	molecular_function	55
binding	molecular_function	3529
biological adhesion	biological_process	1
biological regulation	biological_process	673
carbon utilization	biological_process	2
cargo receptor activity	molecular_function	4
catalytic activity	molecular_function	3536
cell	cellular_component	2161
cell junction	cellular_component	13
cell proliferation	biological_process	2
cellular component organization or biogenesis	biological_process	405
cellular process	biological_process	2122
detoxification	biological_process	4
developmental process	biological_process	75
extracellular region	cellular_component	95
growth	biological_process	5
immune system process	biological_process	5
localization	biological_process	462
locomotion	biological_process	2
membrane	cellular_component	2354
membrane part	cellular_component	2239
membrane-enclosed lumen	cellular_component	111
metabolic process	biological_process	1842
molecular carrier activity	molecular_function	5
molecular function regulator	molecular_function	84
molecular transducer activity	molecular_function	18
multi-organism process	biological_process	27
multicellular organismal process	biological_process	70
nucleoid	cellular_component	5
nutrient reservoir activity	molecular_function	5
organelle	cellular_component	1648
organelle part	cellular_component	630
protein tag	molecular_function	3
protein-containing complex	cellular_component	677
reproduction	biological_process	37
reproductive process	biological_process	37
response to stimulus	biological_process	447
rhythmic process	biological_process	7
signaling	biological_process	171
structural molecule activity	molecular_function	243
supramolecular complex	cellular_component	37
symplast	cellular_component	13
transcription regulator activity	molecular_function	238
translation regulator activity	molecular_function	1
transporter activity	molecular_function	432
virion	cellular_component	42
virion part	cellular_component	42
